# Supplementary material
Source: PubMed Central journal article supplement (PMC3977231)
Supplement: 1402562111_pnas.201402562SI.pdf [file 1402562111_pnas.201402562SI.pdf]

# Supporting Information

Li et al. 10.1073/pnas.1402562111

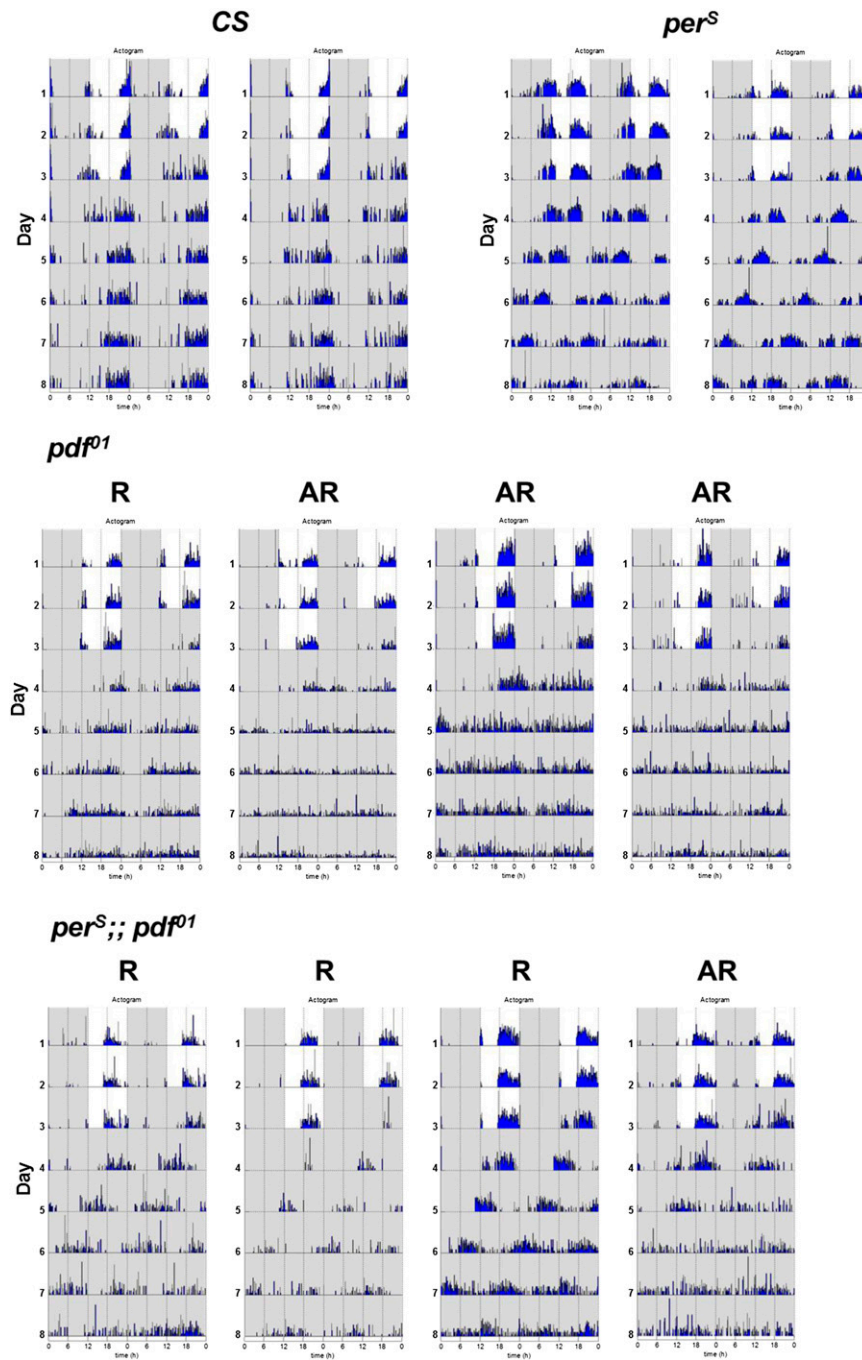

**Fig. S1.** Representative actograms for individual flies. The activities of several flies of each genotype shown in Fig. 1 were measured individually. The data were double plotted. The locomotive activity of most WT (*cs*) and *per<sup>S</sup>* flies was rhythmic. About 40% *pdf<sup>01</sup>* and 80% *per<sup>S</sup>;; pdf<sup>01</sup>* flies were rhythmic. The individual actograms of both rhythmic (R) and arrhythmic (AR) are shown here.

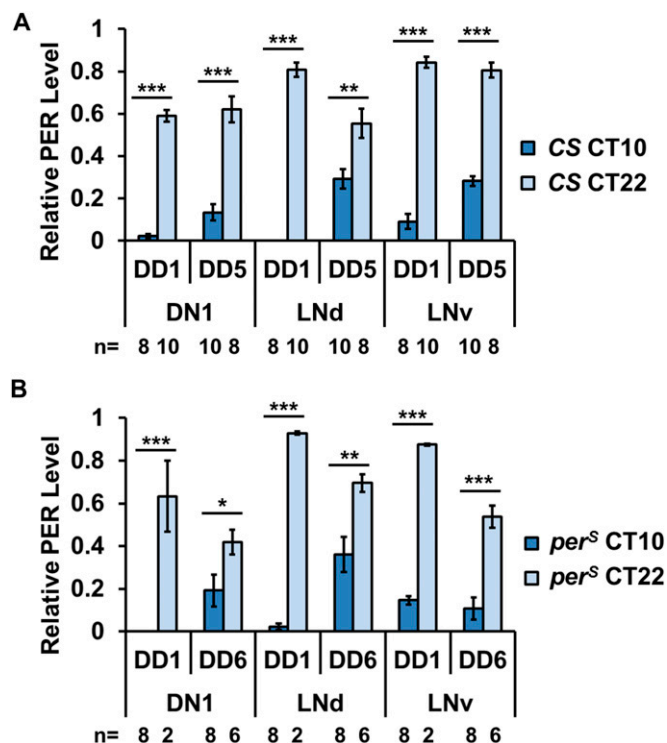

**Fig. S2.** PER oscillations in the different clock neurons of WT and *per<sup>S</sup>* flies in DD. The PER signals in DN1s, LNds, and LNvs from the brains of WT (*cs*) and *per<sup>S</sup>* flies were tested with the same method as described in Fig. 2. CT10 and CT22 are the 10th and 22nd “hour units” in constant-dark condition, respectively. DD1, 5, and 6 indicate the first, fifth, and sixth period cycle in constant-dark condition, respectively. The histograms represent the mean relative PER intensity in the indicated neurons in *cs* flies (A) and *per<sup>S</sup>* flies (B). “n” indicates the number of brain hemispheres. Error bars represent  $\pm$ SEM. The triple asterisk (\*\*\*) represents  $P < 0.001$ , the double asterisk (\*\*) represents  $P < 0.01$ , and the single asterisk (\*) represents  $P < 0.05$ , as determined by Student *t* test.

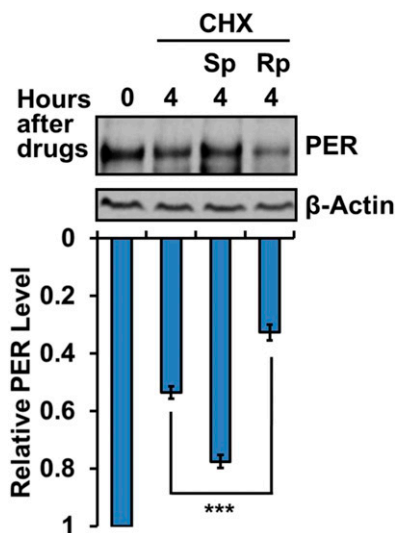

**Fig. S3.** Inhibition of cAMP-dependent pathways destabilizes PER in S2 cells. To study the effect of inhibition of cAMP-dependent pathways, PER degradation rate was assayed in S2 cells as described in Fig. 3. Cells were treated with Rp-cAMPS (Rp). The PER level at 4 h post drug application was compared with PER in the cells treated with Sp-cAMPS (Sp). The triple asterisk (\*\*\*) in the histogram represents  $P < 0.001$  as determined by Student *t* test.
